# Supplementary material for: Inferences of evolutionary history of a widely distributed mangrove species, Bruguiera gymnorrhiza, in the Indo-West Pacific region
Source: PubMed Central journal article supplement (PMC3728962; doi:10.1002/ece3.624), 2013-06-07

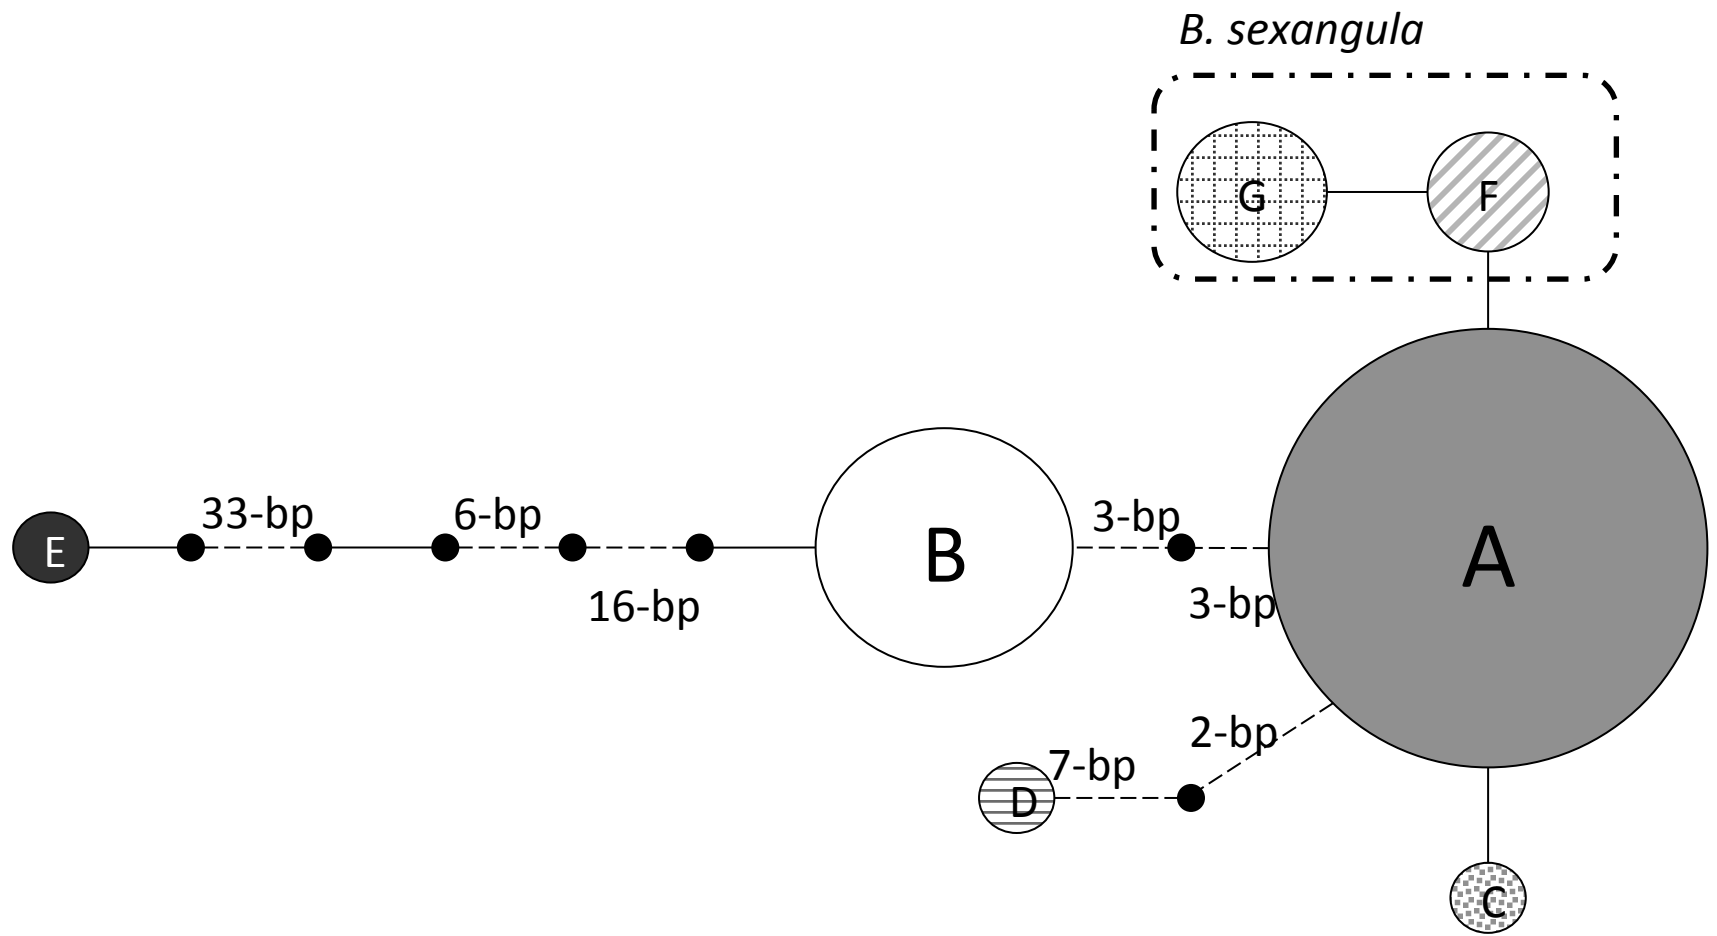

Supplement: ece30003-2251-SD2.pdf [file ece30003-2251-SD2.pdf]
